# Supplementary material for: The Chemokines Initiating and Maintaining Immune Hot Phenotype Are Prognostic in ICB of HNSCC
Source: Front Genet. 2022 May 27;13:820065. doi: 10.3389/fgene.2022.820065 (PMC9186378; doi:10.3389/fgene.2022.820065)
Supplement: Supplementary file 11 [file Table1.xlsx]

## Sheet: Sheet1
	TCGA cohort	GSE65858	GSE40774	GSE39366	GSE117973	GSE41613
Age
<60	256	117		57	25	34
>=60	245	153		81	52	63
unkown			134
Gender
male	134	47	23	43	17	31
female	368	223	111	95	60	66
Primary site
Larynx and hypopharynx	126	81	12	43	16
Oral cavity	310	83	25	55	29
Oropharynx	65	102	76	34	32
unkown	0	4	30	6	0	97
Smoking
yes	369	48		109	53
no	132	222		27	24
unkown	0	0	134	2	0	97
HPV status
Negative	81	196	76	82	54	97
Postive	41	60	58	13	23	0
unkown	379	14	0	43	0	0
Stage
I/II	114	55	0	24	37	41
III/IV	374	215	0	104	40	56
unkown	13	0	134	10	0	0
OS.time(days)
Mean	959	883	1320
Quartile	377; 1276	598; 1073	510; 1980
OS.state
yes	219	176	51
no	282	94	46
unkown	0	0	0
